# Supplementary material for: Unravelling the influence of structure on the optical properties of a pair of aza-BODIPY isomers and their application in photodynamic therapy
Source: Royal Society of Chemistry journal article supplement (doi:10.1039/d4tb02134g), 2024-12-16
Supplement: d4tb02134g1.pdf [file d4tb02134g1.pdf]

## **Unravelling structural insight into optical properties of a pair of aza-BODIPY isomers and application for photodynamic therapy**

Di Tao,<sup>‡,a</sup> Chenshuang Dong,<sup>‡,b</sup> Yanru Huang,<sup>a</sup> Yunsheng Xue,<sup>c</sup> Yuehong Zhang,<sup>a</sup>  
Guiling Wang,<sup>\*b</sup> Xin-Dong Jiang,<sup>\*a</sup> Gaowu Qin<sup>\*a</sup>

1. Experiment
2. NMR
3. HRMS
- 4 Table
5. Figure
6. X-ray data
7. Cartesian coordinates
8. Reference

## 1. Experiment

### 1.1 General

Unless otherwise noted, all chemical reagents and organic solvents were of analytical quality and obtained from Energy Chemical & Technology (Shanghai) Co. Ltd. without extra purification. A VARIAN Mercury 500 MHz spectrometer has been employed to record  $^1\text{H}$  NMR spectra. Determined  $^1\text{H}$  NMR chemical shifts ( $\delta$ ) from  $\text{Me}_4\text{Si}$  are presented in ppm downfield by trace amounts of chloroform (7.26 ppm). On a VARIAN Mercury 125 MHz spectrometer,  $^{13}\text{C}$  NMR spectra were obtained in  $\text{CDCl}_3$ , reporting in ppm with the internal chloroform signal at  $\delta = 77.0$  ppm as the reference. The precise molecular weight of the product was determined using a high resolution mass spectrometer. At 298 K, an absorption spectrogram was taken using a UV-2550 spectrophotometer. Utilizing an F-128 spectrophotometer, fluorescence spectra have been recorded and displayed as  $\text{cm}^{-1}$ . The F-98 spectrophotometer was used for measuring the absolute fluorescence quantum yield. A temperature-measuring camera maintains record of the solution temperatures. A fiber connected laser system was implemented to control a 915 nm laser, which was deployed as the light source for the light irradiation and was bought from Changchun New Industries Optoelectronics Technology. A CEL-NP 2000 power meter was used to test the optical power density, it was bought from Beijing Zhong Jiao Jin Yuan Technology Co, Ltd. The CCK8 assay was via BioTek Synergy H1 microplate reader. To estimate fluorescence visualization, a Confocal Laser Fluorescence Microscope FV1200 (Olympus, Japan) was employed.

### 1.2 Computational method

All calculations have been performed by using the Gaussian 09 programs <sup>[1]</sup>. Geometrical structures were optimized using the DFT method with the hybrid functional PBE0 <sup>[2]</sup> and TZVP basis set. Vibrational frequencies were calculated at the same level to characterize the stationary point as minima points. The vertical transition energies were calculated using the TDDFT method with PBE0 and TZVP basis set. Solvent effects were simulated using the polarizable continuum model

(PCM) [3, 4]. NCI (noncovalent interactions) analysis was performed by Multiwfn program [5] according to the previously described methodology [6]. VMD software [7] was used to generate the NCI plots.

### 1.3 Singlet oxygen detection

Utilizing 1,3-diphenylisobenzofuran (DPBF), the  $^1\text{O}_2$  production in toluene was determined. The absorbance of DPBF at 416 nm was adjusted to about 1.5 in toluene and the absorbance of dye molecule was adjusted to about 0.8. The characteristic absorption of DPBF was applied to characterize  $^1\text{O}_2$  production. The absorption value of the dye molecule indicates the photo-stability of the dye. The 808 nm laser light source is used, the optical radiation power is  $0.1 \text{ W/cm}^2$ , and the illuminated time is 0-17 min.

The  $^1\text{O}_2$  production efficiency of the dyes can be calculated by the following formula under the reference of methylene blue (MB) with known  $^1\text{O}_2$  production rate efficiency (57% in DCM solution).

$$\Phi_{\text{sam}} = \Phi_{\text{MB}} \left( \frac{m_{\text{sam}}}{m_{\text{MB}}} \right) \left( \frac{F_{\text{MB}}}{F_{\text{sam}}} \right)$$

Where “sam” represents the unknown dye molecule and “MB” represents the reference methylene blue. “m” is the slope of DPBF absorption peak decline, “F” is the absorption correction factor,  $F = 1 - 10^{-\text{O.D.}}$ . O.D. represents the absorption value of the sample at the wavelength of light radiation.

### 1.4 Calculation of photothermal efficiency

The photothermal conversion efficiencies ( $\eta$ ) was calculated using the following method:

$$\eta = \frac{hs(T_{\text{Max}} - T_{\text{Surr}}) - Q_{\text{Dis}}}{I(1 - 10^{-A})}$$

$h$  means heat transfer coefficient,  $s$  was for container surface area,  $Q_{\text{Dis}}$  stands for heat dispersed from the laser via the solvent and container,  $I$  was for laser power, and  $A$  represents for absorbance at excitation wavelength.  $\eta$  denotes photothermal conversion efficiency.

$$hs = \frac{mC}{\tau_s}$$

$m$  is the total quantity of the photothermal reagent containing solution,  $C$  represents the temperature coefficient, and  $\tau_s$  is the relevant time constant.

$$t = -\tau_s \ln(\theta)$$

The temperature of the driving force is a non-dimensional parameter termed  $\theta$ .

$$\theta = \frac{T - T_{Surr}}{T_{Max} - T_{Surr}}$$

$T$  is the current temperature,  $T_{Max}$  is the highest steady state temperature, and  $T_{Surr}$  denotes the surrounding temperature.

### 1.5 CCK8 Cytotoxicity Assay

Human colorectal cancer (HCT116) cells were seeded in a 96-well plate. To determine the optimal concentration of dye NPs, various concentration gradients (0-40  $\mu\text{M}$ ) were added to the light exposure group and the dye NPs plus light exposure group. After treatment with the photosensitizer, the cells were incubated for 2 hours and then irradiated with 635 nm radiation (0.8 W  $\text{cm}^{-2}$ , 20 min). Subsequently, the Cell Counting Kit-8 (CCK8) was added to each well, followed by a further 2-hour incubation. The absorbance at 450 nm was measured using a microplate reader. Cell viability (%) =  $(\text{OD}_{\text{dye}} - \text{OD}_{\text{blank}}) / (\text{OD}_{\text{control}} - \text{OD}_{\text{blank}}) \times 100\%$ .

### 1.6 AM/PI Dual-Staining of Live-Dead Cells

Human colorectal cancer (HCT116) cells were seeded in a 24-well plate. To observe the dark and phototoxicity of dye NPs, cells were divided into several groups for treatment. Control group, 30  $\mu\text{M}$  dye NPs treatment group, 635 nm light exposure group; 635 nm light exposure + 30  $\mu\text{M}$  dye NPs group. The experiment used a Calcein-AM/PI dual-staining kit, and after a 30-minute incubation, confocal fluorescence imaging was performed. Calcein AM exhibits green fluorescence to indicate live cells, while PI emits red fluorescence, indicating dead cells.

### **1.7 Apoptosis Detection**

Apoptosis detection was performed using four groups of cells: control group, light exposure group, dye NPs group, and dye NPs + light exposure group. After a 2-hour treatment, cells were collected using trypsin without EDTA, and  $1 \times 10^5 \sim 5 \times 10^5$  cells were counted and added to Bind Buffer to form a single-cell suspension. Then, 5  $\mu$ l Annexin V-FITC and 10  $\mu$ l PI were added, and the mixture was incubated at room temperature in the dark for 10 minutes, followed by flow cytometry analysis within 1 hour.

### **1.8 ROS Detection**

ROS detection was performed using four groups of cells: control group, light exposure group, dye NPs group, and dye NPs + light exposure group. Cells were seeded at a density of  $10^5 \sim 10^6$  in a six-well plate. After a 2-hour treatment, the DCFH-DA probe was added, and the cells were incubated at 37 °C for 30 minutes. Cells were then collected using trypsin, forming a single-cell suspension, and centrifuged for 5 minutes. The cells were washed three times with PBS. Flow cytometry analysis was performed within 1 hour.

## 1.9 Synthetic route

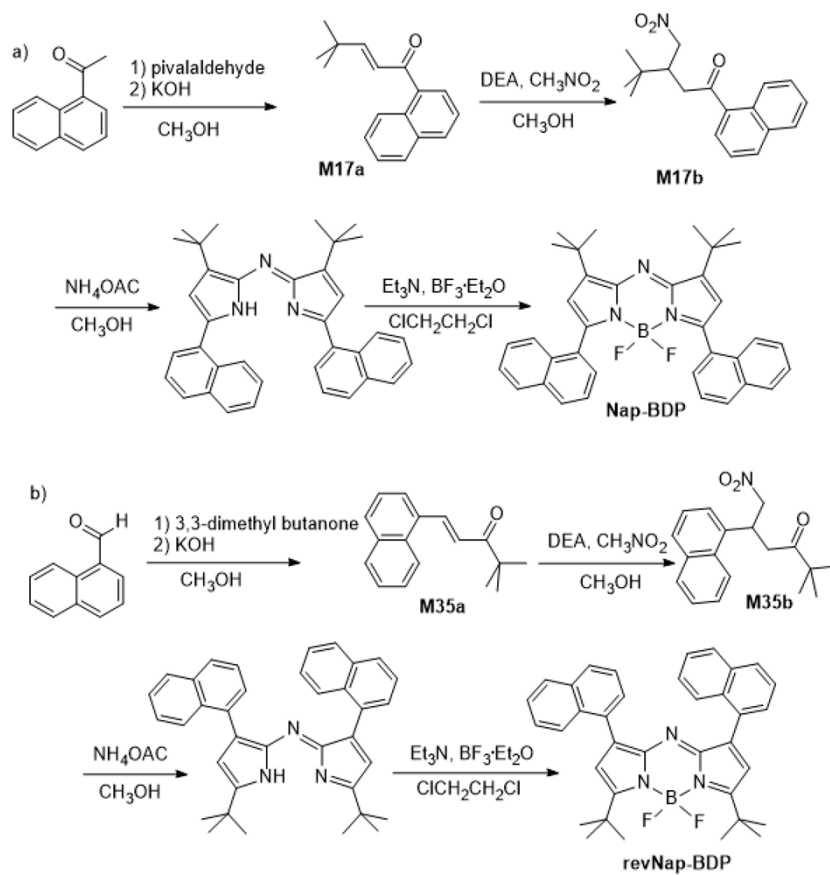

Scheme S1

## 2. NMR

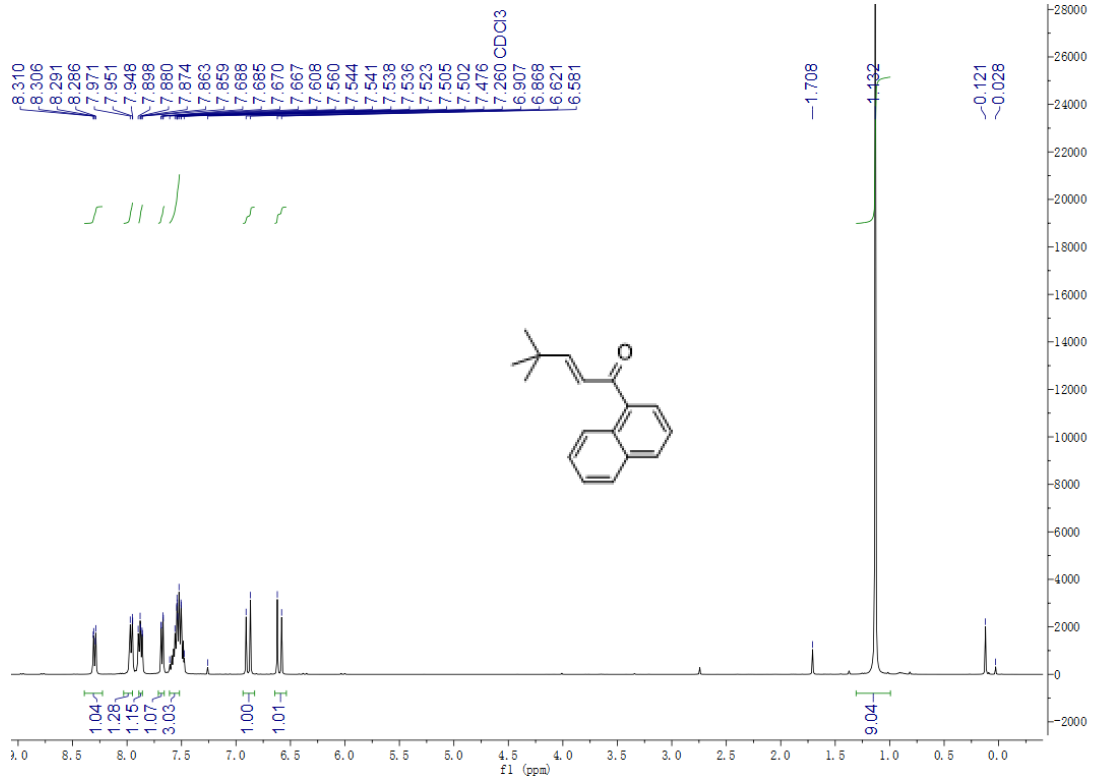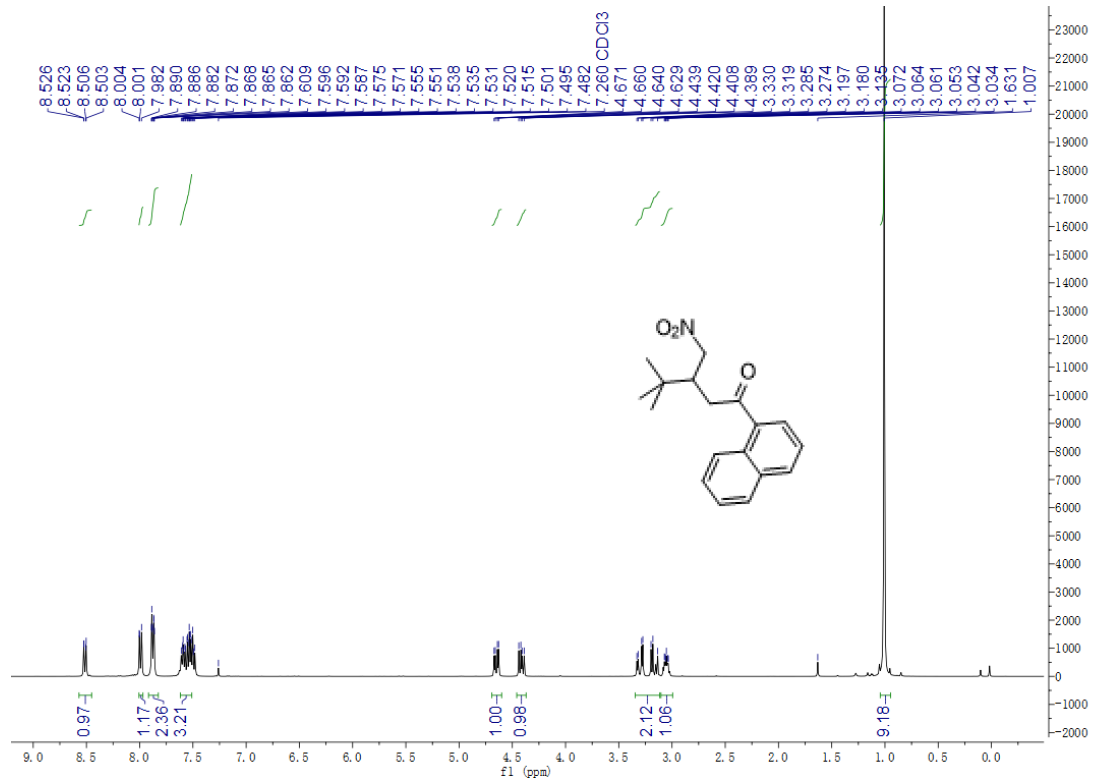

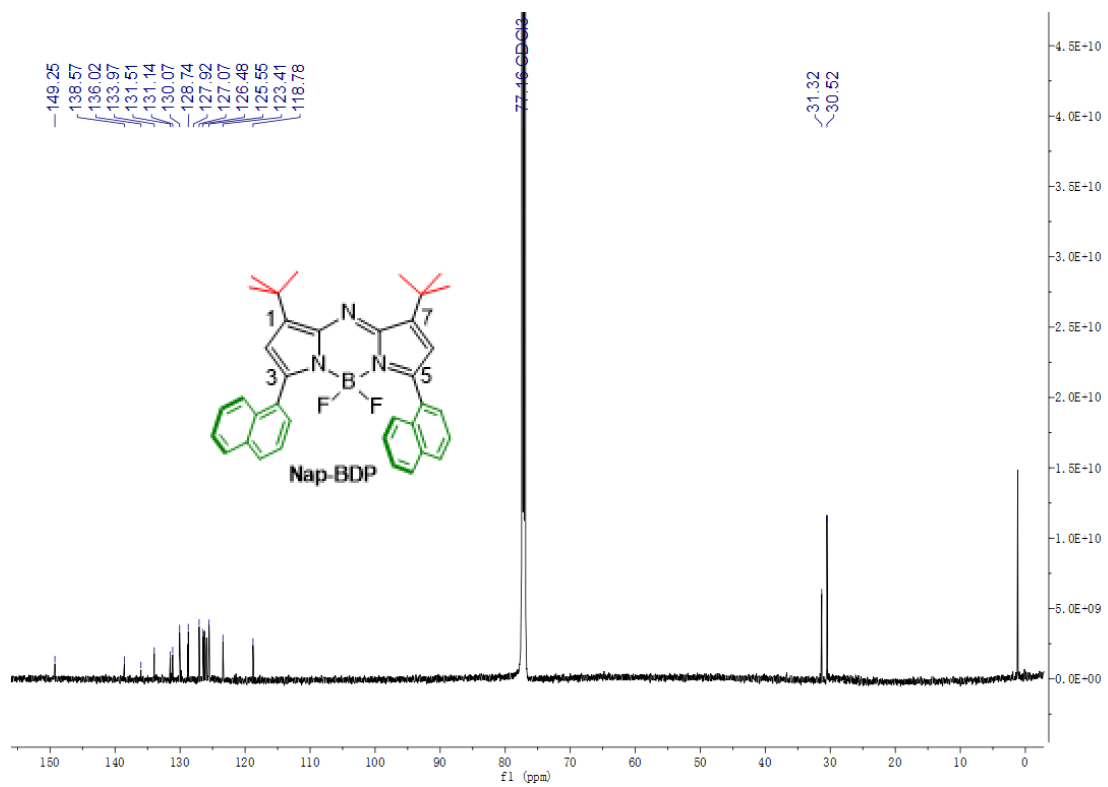







### 3. HRMS

64-5 #32 RT: 0.27 AV: 1 NL: 1.10E3  
T: FTMS + p ESI Full ms [80.0000-1200.0000]

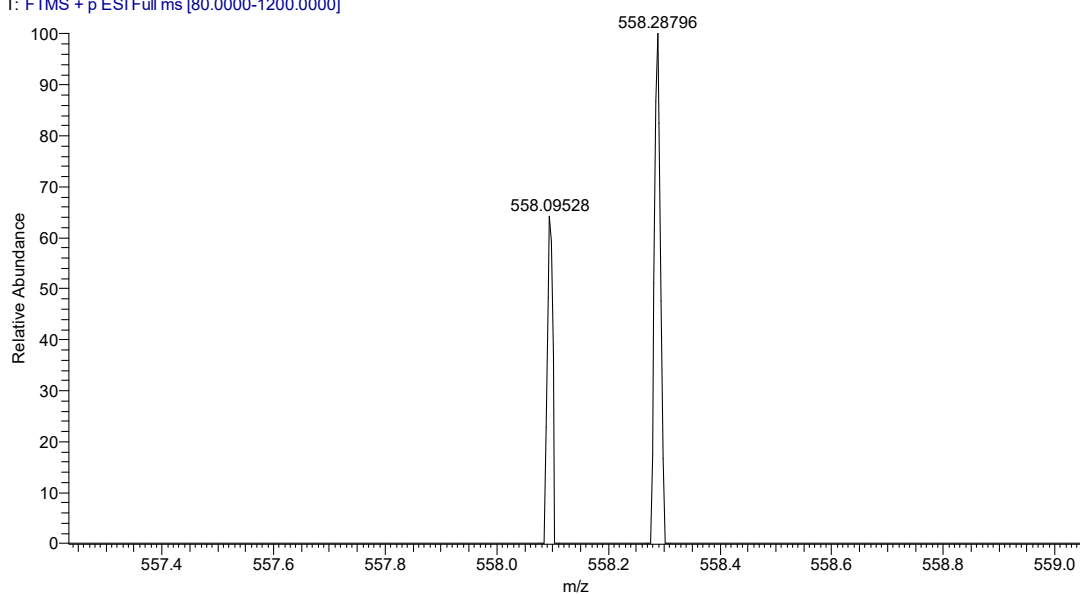

**Nap-BDP:** HRMS (ESI) m/z calcd for  $C_{36}H_{35}BF_2N_3^+$  (M+H)<sup>+</sup> 558.28866, found 558.28796.

188-TD-315-582 #15 RT: 0.09 AV: 1 NL: 9.76E5  
T: FTMS + p ESI Full lock ms [80.0000-1200.0000]

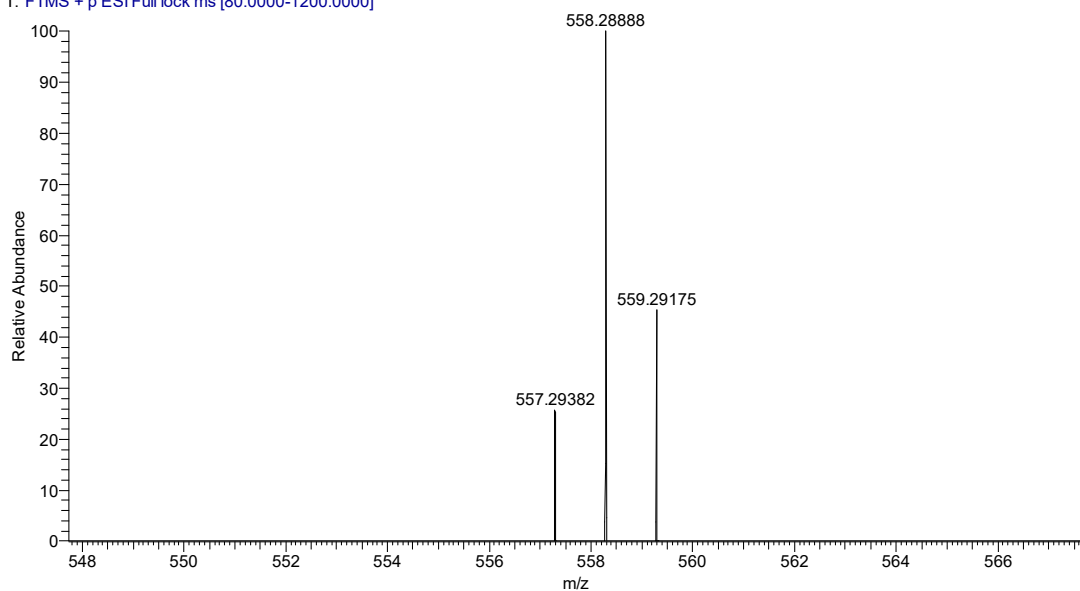

**revNap-BDP:** HRMS (ESI) m/z calcd for  $C_{36}H_{35}BF_2N_3^+$  (M+H)<sup>+</sup> 558.28866, found 558.28888.

#### 4. Table

**Table S1** Structures and application of the reported aza-BODIPYs.

| Dyes                                                                                | $\lambda_{\text{abs}}/\lambda_{\text{em}}$ (nm) | Applicaion                                                     | Reference                                                 |
|-------------------------------------------------------------------------------------|-------------------------------------------------|----------------------------------------------------------------|-----------------------------------------------------------|
| 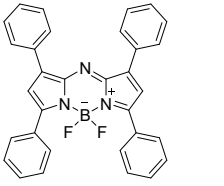   | 640/661                                         | $\Phi_{\text{F}}=0.34$<br>$\eta=38\%$<br>$\Phi_{\Delta}=0.02$  | <i>J. Mater. Chem.B</i> ,<br>2024, <b>12</b> ,1372-1378.  |
|    | 636/665                                         | $\Phi_{\text{F}}=0.15$<br>$\eta=43\%$<br>$\Phi_{\Delta}=0.027$ | <i>J. Mater. Chem.B</i> ,<br>2022, <b>10</b> ,8443-8449.  |
|   | 688/724                                         | $\Phi_{\text{F}}=0.36$<br>$\eta=39\%$<br>$\Phi_{\Delta}=0.021$ | <i>J.Mater. Chem. B</i> ,<br>2024, <b>12</b> ,1372-1378.  |
|  | 664/691                                         | $\Phi_{\text{F}}=0.23$<br>$\Phi_{\Delta}=0.08$                 | <i>Eur. J. Org. Chem.</i><br>2020, 971–977.               |
|  | 818/850                                         | $\Phi_{\text{F}}=0.013$<br>$\Phi_{\Delta}=0.026$               | <i>ACS Chem. Biol.</i><br>2018, <b>13</b> ,<br>1838–1843. |

|                                                                                     |          |                                                     |                                                           |
|-------------------------------------------------------------------------------------|----------|-----------------------------------------------------|-----------------------------------------------------------|
| 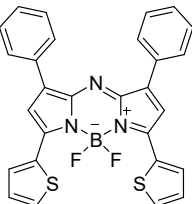   | 717/741  | $\Phi_F=0.24$<br>$\eta=66\%$<br>$\Phi_\Delta=0.004$ | <i>Chem. Sci.</i> , 2024,<br><b>15</b> , 5973.            |
|    | 732/768  | $\Phi_F=0.07$<br>$\Phi_\Delta=0.14$                 | <i>J. Med. Chem.</i> 2020,<br><b>63</b> , 9950–9964.      |
|    | 674/715  | $\Phi_F=0.19$<br>$\eta=48.6\%$<br>$\Phi_\Delta=0$   | <i>Chin. Chem. Lett.</i> ,<br>2024, <b>35</b> , 110460.   |
|  | 850/1000 | $\eta=35\%$                                         | <i>Talanta</i> 2024, <b>279</b> ,<br>126633.              |
|  | 748/805  | $\eta=49.3\%$<br>$\Phi_\Delta=0$                    | <i>J. Mater. Chem. B</i> ,<br>2023,<br><b>11</b> , 10625. |
|  | 906/1023 | $\Phi_F=0.001$<br>$\eta=79\%$<br>$\Phi_\Delta=0.02$ | <i>ACS Materials Lett.</i><br>2024, <b>6</b> , 4765–4773. |

|                                                                                     |          |                                                         |                                                          |
|-------------------------------------------------------------------------------------|----------|---------------------------------------------------------|----------------------------------------------------------|
| 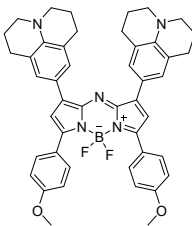   | 910/1060 | $\Phi_f=0.001$<br>$\Phi_{\Delta}=0$<br>$\eta=61\%$      | <i>Chem. Commun.</i> ,<br>2019, <b>55</b> , 10920-10923. |
|    | 862/998  | $\Phi_f=0.003$<br>$\eta=50.5\%$<br>$\Phi_{\Delta}=0$    | <i>Chin. Chem. Lett.</i> ,<br>2024, <b>35</b> , 109735.  |
|   | 690/716  | $\Phi_f=0.44$<br>$\eta=43.5\%$<br>$\Phi_{\Delta}=0.011$ | <i>J.Mater.Chem.B</i> ,<br>2022, <b>10</b> ,8443-8449.   |
|  | 746/765  | $\Phi_f=0.12$<br>$\Phi_{\Delta}=0.034$                  | <i>Dyes Pigm</i> , 2022,<br><b>198</b> , 110026.         |
|  | 686/709  | $\Phi_f=0.22$<br>$\Phi_{\Delta}=0.043$                  | <i>Dyes Pigm</i> , 2022,<br><b>198</b> , 110026.         |

|                                                                                                   |         |                                                       |                                                           |
|---------------------------------------------------------------------------------------------------|---------|-------------------------------------------------------|-----------------------------------------------------------|
| 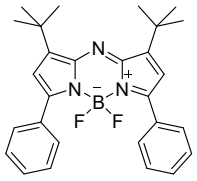                 | 620/650 | $\Phi_F=0.11$<br>$\eta=47\%$<br>$\Phi_\Delta=0.035$   | <i>Chem. Eur. J.</i> 2022,<br><b>28</b> , e202103571.     |
|                  | 662/677 | $\Phi_F=0.13$<br>$\Phi_\Delta=0.041$<br>$\eta=48.1\%$ | <i>J. Mater. Chem. B</i> ,<br>2022, <b>10</b> ,8443-8449. |
|  <p>Nap-BDP</p> | 604/667 | $\Phi_F=0.13$<br>$\Phi_\Delta=0.349$                  | <i>This work</i>                                          |

**Table S2** Photophysical properties of **Nap-BDP** and **revNap-BDP** in various solvents at 298 K.

| solvent           | <b>Nap-BDP</b>                             |      |              |        | <b>revNap-BDP</b>                          |      |              |        |
|-------------------|--------------------------------------------|------|--------------|--------|--------------------------------------------|------|--------------|--------|
|                   | $\lambda_{\text{abs}}/\lambda_{\text{em}}$ | FWHM | Stokes shift | $\phi$ | $\lambda_{\text{abs}}/\lambda_{\text{em}}$ | FWHM | Stokes shift | $\phi$ |
| DMF               | 604/672                                    | 72   | 68           | 0.09   | 584/681                                    | 46   | 97           | 0.22   |
| DMSO              | 606/675                                    | 74   | 69           | 0.08   | 584/683                                    | 50   | 99           | 0.21   |
| DCM               | 604/667                                    | 68   | 63           | 0.13   | 584/663                                    | 44   | 79           | 0.29   |
| toluene           | 612/671                                    | 72   | 59           | 0.12   | 584/657                                    | 48   | 73           | 0.27   |
| PE                | 608/661                                    | 68   | 53           | 0.12   | 580/640                                    | 42   | 60           | 0.27   |
| THF               | 606/669                                    | 68   | 63           | 0.13   | 584/663                                    | 46   | 79           | 0.28   |
| ACN               | 596/663                                    | 70   | 67           | 0.13   | 580/676                                    | 40   | 96           | 0.27   |
| EAC               | 604/665                                    | 64   | 61           | 0.12   |                                            |      |              |        |
| CHCl <sub>3</sub> |                                            |      |              |        | 584/655                                    | 46   | 71           | 0.27   |

**Table S3.** Calculated maximum absorption wavelength  $\lambda_{\text{max,ab}}$  (eV, nm), oscillator strength ( $f$ ) and transition assignment.

| Molecule          | state          | $E$ (eV) | $\lambda_{\text{max,ab}}$ (nm) | $f$    | Assignment | Exp. (nm) |
|-------------------|----------------|----------|--------------------------------|--------|------------|-----------|
| <b>revNap-BDP</b> | S <sub>1</sub> | 2.1671   | 572.11                         | 0.4194 | HOMO→LUMO  | 584       |
| <b>Nap-BDP</b>    | S <sub>1</sub> | 2.1182   | 585.33                         | 0.7403 | HOMO→LUMO  | 603       |

**Table S4.** Excitation energies (eV) of the low-lying excited states and spin-orbit coupling constants ( $\zeta(S_n, T_n)$ ) between them based on the optimized S<sub>0</sub>-geometries of **revNap-BDP** and **Nap-BDP**.

| Dye               | S <sub>1</sub> | S <sub>2</sub> | T <sub>1</sub> | T <sub>2</sub> | T <sub>3</sub> | $\Delta E(S_1-T_3)$ | $\Delta E(S_1-T_1)$ | $\zeta_{\text{soc}}$ (cm <sup>-1</sup> ) |
|-------------------|----------------|----------------|----------------|----------------|----------------|---------------------|---------------------|------------------------------------------|
| <b>revNap-BDP</b> | 2.1671         | 3.6951         | 0.9261         | 1.9775         | 2.0226         | <b>0.1445</b>       |                     | <b>0.4818</b>                            |
| <b>Nap-BDP</b>    | 2.1182         | 2.6810         | 0.8322         | 2.2451         | 2.3749         |                     | <b>1.2953</b>       | <b>0.0141</b>                            |



## 5. Figure

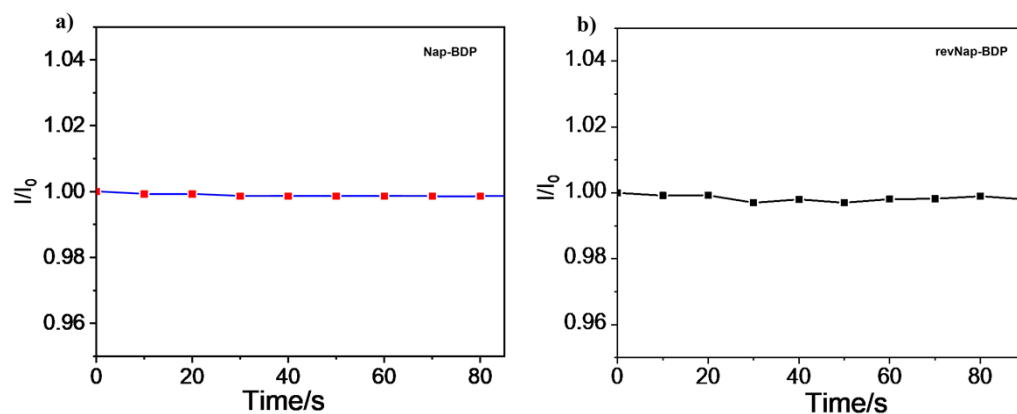

**Fig. S1** ROS generation of **Nap-BDP** (5  $\mu$ M) or **revNap-BDP** (5  $\mu$ M) in THF under continuous 635 nm laser (0.1 W/cm<sup>2</sup>) irradiation for 1.5 min using dihydrorhodamine 123 (DHR123) (10  $\mu$ M) as an indicator.

**Fig. S2** a) Absorption of **Nap-BDP** NPs in aqueous solution at 298 K. b) Absorption spectra of **Nap-BDP** in different proportions of water (0–100%) in THF solution.

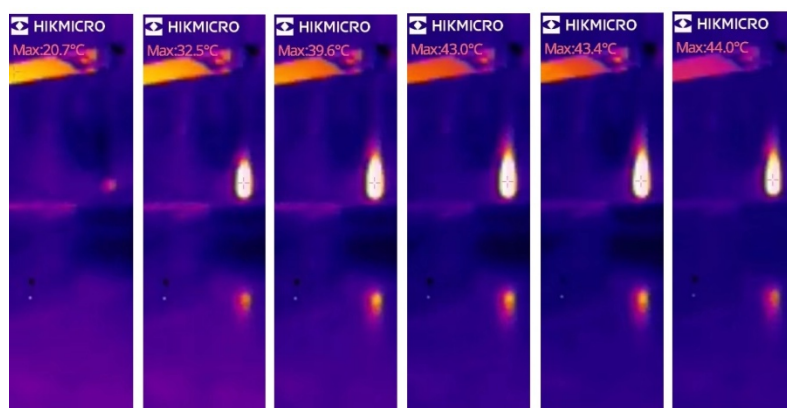

**Fig. S3** Photothermal images (20.7–44.0 °C) of **Nap-BDP** NPs in water

under 635 nm laser irradiation ( $0.8 \text{ W cm}^{-2}$ , 5 min).

**Fig. S 4** a) DLS of **revNap-BDP** NPs in aqueous solution. b) Temperature changes of **revNap-BDP** NPs at different concentrations (20–80  $\mu\text{M}$ ) under 635 nm laser irradiation ( $0.8 \text{ W cm}^{-2}$ ). c) Photothermal conversion of **revNap-BDP** NPs (80  $\mu\text{M}$ ) under 635 nm laser irradiation with different power density ( $0.2\text{--}0.8 \text{ W}\cdot\text{cm}^{-2}$ ). d) Photothermal stability study during five circles of heating-cooling processes. e) Temperature response curves of **revNap-BDP** NPs in aqueous solutions under irradiation and naturally cooling. i) Linear fitting of  $-\ln(\theta)$  and time.

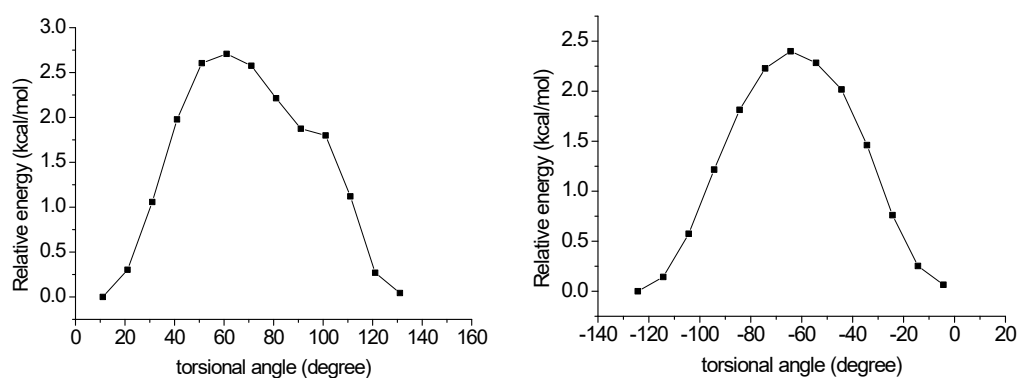

**Fig. S5** Potential curve of the torsion angles of tertiary butyl group in **revNap-BDP** (left) and **Nap-BDP** (right). The rotational barriers are 2.71 and 2.40 kcal/mol, respectively.

## 6. Xray data

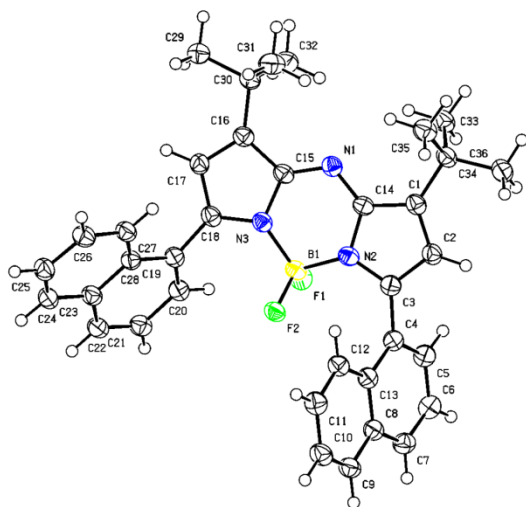

**Table 1 Crystal data and structure refinement for td-17-2.**

|                                        |                                                                |
|----------------------------------------|----------------------------------------------------------------|
| Identification code                    | td-17-2                                                        |
| Empirical formula                      | C <sub>36</sub> H <sub>34</sub> BF <sub>2</sub> N <sub>3</sub> |
| Formula weight                         | 557.47                                                         |
| Temperature/K                          | 118(20)                                                        |
| Crystal system                         | triclinic                                                      |
| Space group                            | P-1                                                            |
| a/Å                                    | 7.6796(3)                                                      |
| b/Å                                    | 9.3847(3)                                                      |
| c/Å                                    | 20.7610(7)                                                     |
| $\alpha$ /°                            | 77.492(3)                                                      |
| $\beta$ /°                             | 89.674(3)                                                      |
| $\gamma$ /°                            | 89.190(3)                                                      |
| Volume/Å <sup>3</sup>                  | 1460.60(9)                                                     |
| Z                                      | 2                                                              |
| $\rho_{\text{calc}}/\text{cm}^3$       | 1.268                                                          |
| $\mu/\text{mm}^{-1}$                   | 0.659                                                          |
| F(000)                                 | 588.0                                                          |
| Crystal size/mm <sup>3</sup>           | 0.14 × 0.12 × 0.11                                             |
| Radiation                              | Cu K $\alpha$ ( $\lambda$ = 1.54184)                           |
| 2 $\theta$ range for data collection/° | 8.726 to 148.574                                               |
| Index ranges                           | -8 ≤ h ≤ 9, -11 ≤ k ≤ 11, -25 ≤ l ≤ 25                         |
| Reflections collected                  | 14754                                                          |
| Independent reflections                | 5652 [R <sub>int</sub> = 0.0401, R <sub>sigma</sub> = 0.0537]  |
| Data/restraints/parameters             | 5652/0/385                                                     |
| Goodness-of-fit on F <sup>2</sup>      | 1.037                                                          |
| Final R indexes [I >= 2 $\sigma$ (I)]  | R <sub>1</sub> = 0.0578, wR <sub>2</sub> = 0.1575              |

Final R indexes [all data]  $R_1 = 0.0692$ ,  $wR_2 = 0.1687$

Largest diff. peak/hole /  $e \text{ \AA}^{-3}$  0.35/-0.27

### Crystal structure determination of [td-17-2]

**Crystal Data** for  $C_{36}H_{34}BF_2N_3$  ( $M=557.47$  g/mol): triclinic, space group P-1 (no. 2),  $a = 7.6796(3)$   $\text{\AA}$ ,  $b = 9.3847(3)$   $\text{\AA}$ ,  $c = 20.7610(7)$   $\text{\AA}$ ,  $\alpha = 77.492(3)^\circ$ ,  $\beta = 89.674(3)^\circ$ ,  $\gamma = 89.190(3)^\circ$ ,  $V = 1460.60(9)$   $\text{\AA}^3$ ,  $Z = 2$ ,  $T = 118(20)$  K,  $\mu(\text{Cu K}\alpha) = 0.659$   $\text{mm}^{-1}$ ,  $D_{\text{calc}} = 1.268$   $\text{g/cm}^3$ , 14754 reflections measured ( $8.726^\circ \leq 2\Theta \leq 148.574^\circ$ ), 5652 unique ( $R_{\text{int}} = 0.0401$ ,  $R_{\text{sigma}} = 0.0537$ ) which were used in all calculations. The final  $R_1$  was 0.0578 ( $I > 2\sigma(I)$ ) and  $wR_2$  was 0.1687 (all data).

**Table 2 Fractional Atomic Coordinates ( $\times 10^4$ ) and Equivalent Isotropic Displacement Parameters ( $\text{\AA}^2 \times 10^3$ ) for td-17-2.  $U_{\text{eq}}$  is defined as 1/3 of the trace of the orthogonalised  $U_{ij}$  tensor.**

| Atom | x           | y          | z          | U(eq)   |
|------|-------------|------------|------------|---------|
| F1   | -1120.9(15) | 2786.2(12) | 7645.6(5)  | 35.0(3) |
| F2   | 256.9(15)   | 3874.7(12) | 6696.1(5)  | 32.9(3) |
| N1   | 2006(2)     | 4848.7(17) | 8419.5(7)  | 28.6(4) |
| N2   | -146(2)     | 5246.8(17) | 7556.8(7)  | 28.7(4) |
| N3   | 1970(2)     | 3194.9(16) | 7686.9(7)  | 27.9(3) |
| C1   | -81(3)      | 6923(2)    | 8217.5(9)  | 29.0(4) |
| C2   | -1405(3)    | 7283(2)    | 7764.3(9)  | 30.5(4) |
| C3   | -1446(3)    | 6245(2)    | 7366.8(9)  | 28.9(4) |
| C4   | -2781(3)    | 6170(2)    | 6865.3(9)  | 29.4(4) |
| C5   | -4481(3)    | 6002(2)    | 7078.0(9)  | 33.5(4) |
| C6   | -5851(3)    | 5913(2)    | 6644.3(10) | 35.2(4) |
| C7   | -5507(3)    | 6018(2)    | 5989.4(10) | 34.3(4) |
| C8   | -3791(3)    | 6259(2)    | 5738.0(9)  | 30.0(4) |
| C9   | -3443(3)    | 6468(2)    | 5051.5(9)  | 34.7(4) |
| C10  | -1790(3)    | 6732(2)    | 4812.1(9)  | 36.9(5) |
| C11  | -421(3)     | 6820(2)    | 5245.7(10) | 35.8(5) |
| C12  | -701(3)     | 6638(2)    | 5910.7(9)  | 30.8(4) |
| C13  | -2399(3)    | 6333.9(19) | 6178.4(9)  | 29.4(4) |
| C14  | 700(2)      | 5621(2)    | 8091.2(8)  | 28.0(4) |
| C15  | 2628(3)     | 3689(2)    | 8229.5(8)  | 28.6(4) |
| C16  | 4169(3)     | 2851(2)    | 8467.4(9)  | 29.1(4) |
| C17  | 4464(3)     | 1964(2)    | 8033.1(9)  | 30.2(4) |
| C18  | 3107(3)     | 2173(2)    | 7560.0(9)  | 29.0(4) |

**Table 2 Fractional Atomic Coordinates ( $\times 10^4$ ) and Equivalent Isotropic Displacement Parameters ( $\text{\AA}^2 \times 10^3$ ) for td-17-2.  $U_{eq}$  is defined as 1/3 of the trace of the orthogonalised  $U_{ij}$  tensor.**

| Atom | x       | y       | z          | U(eq)   |
|------|---------|---------|------------|---------|
| C19  | 2905(3) | 1357(2) | 7039.4(9)  | 29.4(4) |
| C20  | 1363(3) | 666(2)  | 6975.0(9)  | 30.9(4) |
| C21  | 1211(3) | -273(2) | 6535.2(9)  | 33.3(4) |
| C22  | 2611(3) | -517(2) | 6162.5(9)  | 32.8(4) |
| C23  | 4211(3) | 189(2)  | 6197.0(9)  | 31.0(4) |
| C24  | 5658(3) | -31(2)  | 5801.1(9)  | 33.1(4) |
| C25  | 7155(3) | 729(2)  | 5805.4(9)  | 35.3(4) |
| C26  | 7289(3) | 1761(2) | 6206.9(9)  | 34.7(4) |
| C27  | 5936(3) | 1968(2) | 6612.4(9)  | 31.5(4) |
| C28  | 4374(3) | 1172(2) | 6631.5(9)  | 28.8(4) |
| C29  | 6583(3) | 1723(2) | 9210.4(10) | 39.5(5) |
| C30  | 5200(3) | 2938(2) | 9077.4(9)  | 30.7(4) |
| C31  | 6105(3) | 4419(2) | 8978.6(11) | 42.1(5) |
| C32  | 3963(3) | 2754(3) | 9671.2(10) | 41.3(5) |
| C33  | 305(3)  | 6637(2) | 9425.6(9)  | 36.3(5) |
| C34  | 469(3)  | 7699(2) | 8753.5(9)  | 31.6(4) |
| C35  | 2358(3) | 8198(2) | 8640.6(10) | 37.3(5) |
| C36  | -727(3) | 9022(2) | 8750.3(10) | 40.4(5) |
| B1   | 176(3)  | 3740(2) | 7367.2(10) | 28.8(4) |

**Table 3 Anisotropic Displacement Parameters ( $\text{\AA}^2 \times 10^3$ ) for td-17-2. The Anisotropic displacement factor exponent takes the form:  $-2\pi^2[h^2a^{*2}U_{11}+2hka^*b^*U_{12}+\dots]$ .**

| Atom | $U_{11}$ | $U_{22}$ | $U_{33}$ | $U_{23}$ | $U_{13}$ | $U_{12}$ |
|------|----------|----------|----------|----------|----------|----------|
| F1   | 35.0(6)  | 32.8(6)  | 37.0(6)  | -6.9(5)  | 3.7(5)   | -4.5(5)  |
| F2   | 42.5(7)  | 32.5(6)  | 24.2(5)  | -7.6(4)  | -2.0(5)  | 2.2(5)   |
| N1   | 32.3(9)  | 29.6(8)  | 23.1(7)  | -3.7(6)  | 3.6(6)   | -1.1(7)  |
| N2   | 32.1(9)  | 30.5(8)  | 23.3(7)  | -5.4(6)  | 0.3(6)   | -1.9(7)  |
| N3   | 32.4(9)  | 27.1(7)  | 24.3(7)  | -5.5(6)  | 1.4(6)   | -1.2(6)  |
| C1   | 35.4(11) | 27.8(9)  | 23.0(8)  | -3.9(7)  | 3.8(7)   | -1.5(8)  |
| C2   | 36.5(11) | 29.2(9)  | 25.4(8)  | -5.1(7)  | 2.0(8)   | 2.5(8)   |
| C3   | 31.2(10) | 30.0(9)  | 24.3(8)  | -2.9(7)  | 3.3(7)   | -1.0(8)  |
| C4   | 33.3(11) | 26.5(9)  | 27.3(9)  | -3.7(7)  | 0.4(8)   | 0.1(8)   |
| C5   | 36.2(11) | 34.2(10) | 27.7(9)  | -1.2(7)  | 3.6(8)   | 0.3(8)   |
| C6   | 33.0(11) | 33.9(10) | 36.4(10) | -2.6(8)  | 3.0(8)   | -1.6(8)  |
| C7   | 37.2(11) | 29.8(10) | 35.2(10) | -5.1(8)  | -5.2(8)  | -1.1(8)  |

**Table 3 Anisotropic Displacement Parameters ( $\text{\AA}^2 \times 10^3$ ) for td-17-2. The Anisotropic displacement factor exponent takes the form:  $-2\pi^2[h^2a^{*2}U_{11}+2hka^*b^*U_{12}+\dots]$ .**

| Atom | $U_{11}$ | $U_{22}$ | $U_{33}$ | $U_{23}$ | $U_{13}$  | $U_{12}$ |
|------|----------|----------|----------|----------|-----------|----------|
| C8   | 34.9(11) | 26.3(9)  | 28.6(9)  | -5.2(7)  | -0.6(8)   | -0.3(8)  |
| C9   | 44.8(12) | 31.4(10) | 28.0(9)  | -7.0(8)  | -5.5(8)   | 1.2(9)   |
| C10  | 48.2(13) | 36.4(10) | 25.1(9)  | -4.7(8)  | 2.2(8)    | 0.2(9)   |
| C11  | 41.4(12) | 34.4(10) | 29.7(9)  | -2.6(8)  | 4.8(8)    | -1.6(9)  |
| C12  | 35.1(11) | 29.2(9)  | 27.5(9)  | -4.6(7)  | 1.4(8)    | -2.3(8)  |
| C13  | 36.1(11) | 24.2(8)  | 26.9(9)  | -3.5(7)  | 0.8(8)    | 0.2(8)   |
| C14  | 31.3(10) | 30.0(9)  | 22.1(8)  | -4.5(7)  | 0.8(7)    | -2.5(8)  |
| C15  | 34.3(11) | 29.6(9)  | 21.8(8)  | -5.3(7)  | 1.4(7)    | -2.4(8)  |
| C16  | 33.5(10) | 28.3(9)  | 24.4(8)  | -3.5(7)  | 0.7(7)    | -1.8(8)  |
| C17  | 35.2(11) | 29.7(9)  | 25.5(8)  | -5.9(7)  | 0.9(8)    | 4.6(8)   |
| C18  | 36.3(11) | 27.1(9)  | 23.2(8)  | -4.5(7)  | 3.2(7)    | -0.9(8)  |
| C19  | 38.0(11) | 25.0(9)  | 24.4(8)  | -3.7(7)  | 0.0(7)    | 2.3(8)   |
| C20  | 35.6(11) | 28.3(9)  | 28.4(9)  | -5.2(7)  | 1.2(8)    | -0.4(8)  |
| C21  | 38.6(11) | 30.0(9)  | 31.1(9)  | -6.2(8)  | -1.6(8)   | -3.0(8)  |
| C22  | 42.6(12) | 28.6(9)  | 27.8(9)  | -7.3(7)  | -2.7(8)   | 0.3(8)   |
| C23  | 40.2(11) | 27.8(9)  | 24.8(8)  | -5.7(7)  | -2.0(8)   | 1.5(8)   |
| C24  | 42.9(12) | 29.4(9)  | 27.7(9)  | -7.8(7)  | 0.2(8)    | 3.3(8)   |
| C25  | 39.4(12) | 37.1(10) | 29.8(9)  | -8.6(8)  | 3.8(8)    | 3.2(9)   |
| C26  | 36.6(11) | 38.4(11) | 29.7(9)  | -8.1(8)  | 2.1(8)    | -3.6(9)  |
| C27  | 36.7(11) | 32.6(10) | 25.8(9)  | -7.9(7)  | -0.3(8)   | 0.4(8)   |
| C28  | 34.1(10) | 27.9(9)  | 23.7(8)  | -4.6(7)  | -1.1(7)   | 2.7(8)   |
| C29  | 45.9(13) | 41.6(11) | 32.0(10) | -10.5(9) | -7.9(9)   | 7.7(10)  |
| C30  | 35.3(11) | 33.8(10) | 23.1(8)  | -6.4(7)  | 0.1(8)    | 1.0(8)   |
| C31  | 50.6(14) | 38.2(11) | 36.7(10) | -6.1(9)  | -10.0(10) | -3.6(10) |
| C32  | 43.3(13) | 53.2(13) | 25.3(9)  | -4.3(9)  | 1.3(8)    | 5.7(10)  |
| C33  | 48.0(13) | 35.8(10) | 25.3(9)  | -7.0(8)  | 3.1(8)    | 0.3(9)   |
| C34  | 40.9(11) | 29.9(9)  | 24.7(8)  | -7.7(7)  | 1.0(8)    | 0.7(8)   |
| C35  | 45.8(13) | 32.2(10) | 33.9(10) | -6.7(8)  | -1.4(9)   | -4.2(9)  |
| C36  | 53.7(14) | 35.4(11) | 33.6(10) | -11.4(8) | -2.3(9)   | 7.1(10)  |
| B1   | 33.2(12) | 30.2(10) | 23.2(9)  | -6.3(8)  | 0.8(8)    | -2.9(9)  |

**Table 4 Bond Lengths for td-17-2.**

| Atom | Atom | Length/ $\text{\AA}$ | Atom | Atom | Length/ $\text{\AA}$ |
|------|------|----------------------|------|------|----------------------|
| F1   | B1   | 1.387(2)             | C11  | C12  | 1.370(3)             |
| F2   | B1   | 1.373(2)             | C12  | C13  | 1.423(3)             |
| N1   | C14  | 1.330(3)             | C15  | C16  | 1.440(3)             |

**Table 4 Bond Lengths for td-17-2.**

| Atom | Atom | Length/Å | Atom | Atom | Length/Å |
|------|------|----------|------|------|----------|
| N1   | C15  | 1.318(2) | C16  | C17  | 1.370(3) |
| N2   | C3   | 1.359(3) | C16  | C30  | 1.515(3) |
| N2   | C14  | 1.400(2) | C17  | C18  | 1.418(3) |
| N2   | B1   | 1.564(3) | C18  | C19  | 1.464(2) |
| N3   | C15  | 1.406(2) | C19  | C20  | 1.379(3) |
| N3   | C18  | 1.354(2) | C19  | C28  | 1.437(3) |
| N3   | B1   | 1.563(3) | C20  | C21  | 1.406(3) |
| C1   | C2   | 1.378(3) | C21  | C22  | 1.366(3) |
| C1   | C14  | 1.428(3) | C22  | C23  | 1.413(3) |
| C1   | C34  | 1.520(2) | C23  | C24  | 1.418(3) |
| C2   | C3   | 1.407(3) | C23  | C28  | 1.430(2) |
| C3   | C4   | 1.479(3) | C24  | C25  | 1.363(3) |
| C4   | C5   | 1.376(3) | C25  | C26  | 1.412(3) |
| C4   | C13  | 1.430(2) | C26  | C27  | 1.372(3) |
| C5   | C6   | 1.404(3) | C27  | C28  | 1.418(3) |
| C6   | C7   | 1.366(3) | C29  | C30  | 1.529(3) |
| C7   | C8   | 1.418(3) | C30  | C31  | 1.536(3) |
| C8   | C9   | 1.420(3) | C30  | C32  | 1.533(3) |
| C8   | C13  | 1.423(3) | C33  | C34  | 1.534(3) |
| C9   | C10  | 1.367(3) | C34  | C35  | 1.532(3) |
| C10  | C11  | 1.403(3) | C34  | C36  | 1.533(3) |

**Table 5 Bond Angles for td-17-2.**

| Atom | Atom | Atom | Angle/°    | Atom | Atom | Atom | Angle/°    |
|------|------|------|------------|------|------|------|------------|
| C15  | N1   | C14  | 120.09(16) | C16  | C17  | C18  | 109.27(17) |
| C3   | N2   | C14  | 107.31(15) | N3   | C18  | C17  | 109.27(15) |
| C3   | N2   | B1   | 129.46(16) | N3   | C18  | C19  | 125.11(18) |
| C14  | N2   | B1   | 121.79(16) | C17  | C18  | C19  | 125.53(17) |
| C15  | N3   | B1   | 121.97(15) | C20  | C19  | C18  | 120.35(17) |
| C18  | N3   | C15  | 107.00(16) | C20  | C19  | C28  | 119.90(17) |
| C18  | N3   | B1   | 130.90(15) | C28  | C19  | C18  | 119.53(17) |
| C2   | C1   | C14  | 105.56(16) | C19  | C20  | C21  | 121.33(18) |
| C2   | C1   | C34  | 128.87(17) | C22  | C21  | C20  | 119.87(19) |
| C14  | C1   | C34  | 125.57(17) | C21  | C22  | C23  | 121.22(18) |
| C1   | C2   | C3   | 109.16(17) | C22  | C23  | C24  | 121.60(17) |
| N2   | C3   | C2   | 108.98(16) | C22  | C23  | C28  | 119.53(18) |
| N2   | C3   | C4   | 125.17(16) | C24  | C23  | C28  | 118.86(18) |

**Table 5 Bond Angles for td-17-2.**

| Atom | Atom | Atom | Angle/°    | Atom | Atom | Atom | Angle/°    |
|------|------|------|------------|------|------|------|------------|
| C2   | C3   | C4   | 125.63(17) | C25  | C24  | C23  | 121.08(18) |
| C5   | C4   | C3   | 117.12(16) | C24  | C25  | C26  | 120.23(19) |
| C5   | C4   | C13  | 119.39(18) | C27  | C26  | C25  | 120.28(19) |
| C13  | C4   | C3   | 123.41(17) | C26  | C27  | C28  | 120.99(18) |
| C4   | C5   | C6   | 121.87(18) | C23  | C28  | C19  | 118.04(17) |
| C7   | C6   | C5   | 119.63(19) | C27  | C28  | C19  | 123.47(17) |
| C6   | C7   | C8   | 120.87(19) | C27  | C28  | C23  | 118.40(17) |
| C7   | C8   | C9   | 121.14(19) | C16  | C30  | C29  | 109.86(15) |
| C7   | C8   | C13  | 119.47(17) | C16  | C30  | C31  | 110.17(16) |
| C9   | C8   | C13  | 119.37(18) | C16  | C30  | C32  | 109.23(17) |
| C10  | C9   | C8   | 120.73(19) | C29  | C30  | C31  | 108.88(18) |
| C9   | C10  | C11  | 119.89(18) | C29  | C30  | C32  | 109.10(16) |
| C12  | C11  | C10  | 121.30(19) | C32  | C30  | C31  | 109.59(17) |
| C11  | C12  | C13  | 120.30(19) | C1   | C34  | C33  | 108.76(15) |
| C8   | C13  | C4   | 118.66(17) | C1   | C34  | C35  | 109.95(15) |
| C8   | C13  | C12  | 118.39(17) | C1   | C34  | C36  | 110.06(17) |
| C12  | C13  | C4   | 122.89(18) | C35  | C34  | C33  | 109.73(17) |
| N1   | C14  | N2   | 123.91(17) | C35  | C34  | C36  | 109.70(17) |
| N1   | C14  | C1   | 127.13(17) | C36  | C34  | C33  | 108.61(16) |
| N2   | C14  | C1   | 108.96(17) | F1   | B1   | N2   | 109.14(15) |
| N1   | C15  | N3   | 123.22(18) | F1   | B1   | N3   | 109.75(16) |
| N1   | C15  | C16  | 127.33(17) | F2   | B1   | F1   | 111.19(16) |
| N3   | C15  | C16  | 108.98(16) | F2   | B1   | N2   | 111.84(16) |
| C15  | C16  | C30  | 126.40(16) | F2   | B1   | N3   | 110.19(16) |
| C17  | C16  | C15  | 105.28(16) | N3   | B1   | N2   | 104.52(15) |
| C17  | C16  | C30  | 128.32(18) |      |      |      |            |

**Table 6 Torsion Angles for td-17-2.**

| A  | B   | C   | D   | Angle/°     | A   | B   | C   | D   | Angle/°     |
|----|-----|-----|-----|-------------|-----|-----|-----|-----|-------------|
| N1 | C15 | C16 | C17 | -167.84(18) | C15 | N1  | C14 | C1  | -177.76(18) |
| N1 | C15 | C16 | C30 | 13.1(3)     | C15 | N3  | C18 | C17 | 2.2(2)      |
| N2 | C3  | C4  | C5  | 115.2(2)    | C15 | N3  | C18 | C19 | 178.91(17)  |
| N2 | C3  | C4  | C13 | -68.1(3)    | C15 | N3  | B1  | F1  | -93.55(19)  |
| N3 | C15 | C16 | C17 | 4.5(2)      | C15 | N3  | B1  | F2  | 143.69(16)  |
| N3 | C15 | C16 | C30 | -174.57(16) | C15 | N3  | B1  | N2  | 23.4(2)     |
| N3 | C18 | C19 | C20 | -50.1(3)    | C15 | C16 | C17 | C18 | -3.1(2)     |
| N3 | C18 | C19 | C28 | 135.3(2)    | C15 | C16 | C30 | C29 | 171.96(18)  |



**Table 6 Torsion Angles for td-17-2.**

| A   | B   | C   | D   | Angle/°     | A   | B   | C   | D   | Angle/°     |
|-----|-----|-----|-----|-------------|-----|-----|-----|-----|-------------|
| C1  | C2  | C3  | N2  | -0.9(2)     | C15 | C16 | C30 | C31 | -68.1(2)    |
| C1  | C2  | C3  | C4  | 173.87(17)  | C15 | C16 | C30 | C32 | 52.3(2)     |
| C2  | C1  | C14 | N1  | -178.09(18) | C16 | C17 | C18 | N3  | 0.7(2)      |
| C2  | C1  | C14 | N2  | 1.3(2)      | C16 | C17 | C18 | C19 | -176.06(17) |
| C2  | C1  | C34 | C33 | 120.2(2)    | C17 | C16 | C30 | C29 | -6.9(3)     |
| C2  | C1  | C34 | C35 | -119.6(2)   | C17 | C16 | C30 | C31 | 113.1(2)    |
| C2  | C1  | C34 | C36 | 1.3(3)      | C17 | C16 | C30 | C32 | -126.5(2)   |
| C2  | C3  | C4  | C5  | -58.8(3)    | C17 | C18 | C19 | C20 | 126.1(2)    |
| C2  | C3  | C4  | C13 | 118.0(2)    | C17 | C18 | C19 | C28 | -48.5(3)    |
| C3  | N2  | C14 | N1  | 177.53(16)  | C18 | N3  | C15 | N1  | 168.57(17)  |
| C3  | N2  | C14 | C1  | -1.9(2)     | C18 | N3  | C15 | C16 | -4.13(19)   |
| C3  | N2  | B1  | F1  | -68.1(2)    | C18 | N3  | B1  | F1  | 81.8(2)     |
| C3  | N2  | B1  | F2  | 55.3(3)     | C18 | N3  | B1  | F2  | -40.9(3)    |
| C3  | N2  | B1  | N3  | 174.54(16)  | C18 | N3  | B1  | N2  | -161.25(17) |
| C3  | C4  | C5  | C6  | -179.80(17) | C18 | C19 | C20 | C21 | -171.87(17) |
| C3  | C4  | C13 | C8  | -179.23(16) | C18 | C19 | C28 | C23 | 170.66(16)  |
| C3  | C4  | C13 | C12 | -2.3(3)     | C18 | C19 | C28 | C27 | -12.8(3)    |
| C4  | C5  | C6  | C7  | -1.1(3)     | C19 | C20 | C21 | C22 | 0.1(3)      |
| C5  | C4  | C13 | C8  | -2.5(3)     | C20 | C19 | C28 | C23 | -4.0(3)     |
| C5  | C4  | C13 | C12 | 174.44(18)  | C20 | C19 | C28 | C27 | 172.61(18)  |
| C5  | C6  | C7  | C8  | -1.9(3)     | C20 | C21 | C22 | C23 | -1.6(3)     |
| C6  | C7  | C8  | C9  | -175.67(18) | C21 | C22 | C23 | C24 | -178.54(18) |
| C6  | C7  | C8  | C13 | 2.6(3)      | C21 | C22 | C23 | C28 | 0.3(3)      |
| C7  | C8  | C9  | C10 | 178.57(18)  | C22 | C23 | C24 | C25 | 175.51(19)  |
| C7  | C8  | C13 | C4  | -0.3(3)     | C22 | C23 | C28 | C19 | 2.5(3)      |
| C7  | C8  | C13 | C12 | -177.42(17) | C22 | C23 | C28 | C27 | -174.24(18) |
| C8  | C9  | C10 | C11 | -1.0(3)     | C23 | C24 | C25 | C26 | -0.1(3)     |
| C9  | C8  | C13 | C4  | 177.93(17)  | C24 | C23 | C28 | C19 | -178.67(17) |
| C9  | C8  | C13 | C12 | 0.8(3)      | C24 | C23 | C28 | C27 | 4.6(3)      |
| C9  | C10 | C11 | C12 | 0.4(3)      | C24 | C25 | C26 | C27 | 2.2(3)      |
| C10 | C11 | C12 | C13 | 0.8(3)      | C25 | C26 | C27 | C28 | -0.8(3)     |
| C11 | C12 | C13 | C4  | -178.35(18) | C26 | C27 | C28 | C19 | -179.15(18) |
| C11 | C12 | C13 | C8  | -1.4(3)     | C26 | C27 | C28 | C23 | -2.6(3)     |
| C13 | C4  | C5  | C6  | 3.3(3)      | C28 | C19 | C20 | C21 | 2.7(3)      |
| C13 | C8  | C9  | C10 | 0.3(3)      | C28 | C23 | C24 | C25 | -3.3(3)     |
| C14 | N1  | C15 | N3  | -0.4(3)     | C30 | C16 | C17 | C18 | 175.90(18)  |
| C14 | N1  | C15 | C16 | 170.91(17)  | C34 | C1  | C2  | C3  | -179.48(17) |
| C14 | N2  | C3  | C2  | 1.7(2)      | C34 | C1  | C14 | N1  | 1.2(3)      |

**Table 6 Torsion Angles for td-17-2.**

| A     | B      | C  | D | Angle/°     | A     | B     | C      | D  | Angle/°     |
|-------|--------|----|---|-------------|-------|-------|--------|----|-------------|
| C14N2 | C3     | C4 |   | -173.11(16) | C34C1 | C14N2 |        |    | -179.43(16) |
| C14N2 | B1     | F1 |   | 96.4(2)     | B1    | N2    | C3     | C2 | 167.96(16)  |
| C14N2 | B1     | F2 |   | -140.15(17) | B1    | N2    | C3     | C4 | -6.9(3)     |
| C14N2 | B1     | N3 |   | -21.0(2)    | B1    | N2    | C14N1  |    | 10.0(3)     |
| C14C1 | C2     | C3 |   | -0.2(2)     | B1    | N2    | C14C1  |    | -169.41(15) |
| C14C1 | C34C33 |    |   | -58.9(2)    | B1    | N3    | C15N1  |    | -15.1(3)    |
| C14C1 | C34C35 |    |   | 61.3(2)     | B1    | N3    | C15C16 |    | 172.22(15)  |
| C14C1 | C34C36 |    |   | -177.76(18) | B1    | N3    | C18C17 |    | -173.73(17) |
| C15N1 | C14N2  |    |   | 2.9(3)      | B1    | N3    | C18C19 |    | 3.0(3)      |

**Table 7 Hydrogen Atom Coordinates ( $\text{\AA} \times 10^4$ ) and Isotropic Displacement Parameters ( $\text{\AA}^2 \times 10^3$ ) for td-17-2.**

| Atom | x        | y        | z        | U(eq) |
|------|----------|----------|----------|-------|
| H2   | -2169.76 | 8101.49  | 7726.22  | 37    |
| H5   | -4734.36 | 5944.3   | 7531.22  | 40    |
| H6   | -7010.96 | 5779.93  | 6805.23  | 42    |
| H7   | -6429.82 | 5927.7   | 5698.62  | 41    |
| H9   | -4369.27 | 6424.57  | 4755.46  | 42    |
| H10  | -1568.36 | 6854.98  | 4352.83  | 44    |
| H11  | 722.63   | 7010.91  | 5074.83  | 43    |
| H12  | 243.45   | 6714.22  | 6194.46  | 37    |
| H17  | 5425.83  | 1310.23  | 8046.59  | 36    |
| H20  | 384.48   | 827.62   | 7233.01  | 37    |
| H21  | 136.65   | -737.45  | 6497.27  | 40    |
| H22  | 2507.05  | -1172.27 | 5874.98  | 39    |
| H24  | 5582.57  | -720.59  | 5528.31  | 40    |
| H25  | 8112.12  | 565.53   | 5537.42  | 42    |
| H26  | 8320.17  | 2312.52  | 6196.18  | 42    |
| H27  | 6046.7   | 2655.71  | 6884.52  | 38    |
| H29A | 6018.95  | 773.55   | 9266.1   | 59    |
| H29B | 7221.07  | 1765.91  | 9613.1   | 59    |
| H29C | 7395.9   | 1849.98  | 8837.32  | 59    |
| H31A | 6912.55  | 4527.04  | 8604.37  | 63    |
| H31B | 6752.48  | 4469.83  | 9378.43  | 63    |
| H31C | 5229.1   | 5206.05  | 8890.1   | 63    |
| H32A | 3103.04  | 3553.14  | 9596.69  | 62    |
| H32B | 4632.51  | 2770.08  | 10069.97 | 62    |

**Table 7 Hydrogen Atom Coordinates ( $\text{\AA}\times 10^4$ ) and Isotropic Displacement Parameters ( $\text{\AA}^2\times 10^3$ ) for td-17-2.**

| Atom | x        | y       | z       | U(eq) |
|------|----------|---------|---------|-------|
| H32C | 3364.32  | 1819.62 | 9726.37 | 62    |
| H33A | -889.79  | 6278.6  | 9485.38 | 54    |
| H33B | 587.92   | 7143.92 | 9777.12 | 54    |
| H33C | 1113.22  | 5812.2  | 9443.72 | 54    |
| H35A | 3129.41  | 7343.34 | 8680.48 | 56    |
| H35B | 2677.95  | 8751.88 | 8970.92 | 56    |
| H35C | 2474.07  | 8819.79 | 8198.11 | 56    |
| H36A | -646.4   | 9703.87 | 8321.33 | 61    |
| H36B | -368.34  | 9510.69 | 9098.99 | 61    |
| H36C | -1932.21 | 8696.43 | 8828.53 | 61    |

### Experimental

Single crystals of  $\text{C}_{36}\text{H}_{34}\text{BF}_2\text{N}_3$  [**td-17-2**] were [ ]. A suitable crystal was selected and [ ] on a **XtaLAB AFC12 (RINC): Kappa single** diffractometer. The crystal was kept at 118(20) K during data collection. Using Olex2 [1], the structure was solved with the SHELXT [2] structure solution program using Intrinsic Phasing and refined with the SHELXL [3] refinement package using Least Squares minimisation.

1. Dolomanov, O.V., Bourhis, L.J., Gildea, R.J., Howard, J.A.K. & Puschmann, H. (2009), *J. Appl. Cryst.* 42, 339-341.
2. Sheldrick, G.M. (2015). *Acta Cryst.* A71, 3-8.
3. Sheldrick, G.M. (2015). *Acta Cryst.* C71, 3-8.

### Refinement model description

Number of restraints - 0, number of constraints - unknown.

Details:

#### 1. Fixed Uiso

At 1.2 times of:

All C(H) groups

At 1.5 times of:

All C(H,H,H) groups

#### 2.a Aromatic/amide H refined with riding coordinates:

C2(H2), C5(H5), C6(H6), C7(H7), C9(H9), C10(H10), C11(H11), C12(H12),  
C17(H17), C20(H20), C21(H21), C22(H22), C24(H24), C25(H25), C26(H26), C27(H27)

#### 2.b Idealised Me refined as rotating group:

C29(H29A,H29B,H29C), C31(H31A,H31B,H31C), C32(H32A,H32B,H32C), C33(H33A,H33B,  
H33C), C35(H35A,H35B,H35C), C36(H36A,H36B,H36C)

This report has been created with Olex2, compiled on 2022.04.07 svn.rca3783a0 for OlexSys.

Please let us know if there are any errors or if you would like to have additional features.

## 7. Cartesian coordinates of the species

### revNap-BDP

|   |             |             |             |
|---|-------------|-------------|-------------|
| C | 1.13866400  | 0.45867500  | -0.38541500 |
| N | 1.25876800  | 1.83406400  | -0.20637900 |
| B | 0.00008900  | 2.75289000  | -0.38685900 |
| N | -1.25863100 | 1.83413500  | -0.20625600 |
| C | -1.13862200 | 0.45874600  | -0.38535900 |
| N | -0.00000100 | -0.18398700 | -0.46583900 |
| C | 2.43617000  | -0.13286400 | -0.37071100 |
| C | 3.31364600  | 0.91638100  | -0.17113500 |
| C | 2.57737800  | 2.11763500  | -0.08242600 |
| C | -2.57722100 | 2.11777800  | -0.08223300 |
| C | -3.31357500 | 0.91658700  | -0.17107500 |
| C | -2.43616600 | -0.13270900 | -0.37067800 |
| C | 2.71851300  | -1.54903800 | -0.56554300 |
| C | -2.71860300 | -1.54885400 | -0.56558700 |
| C | 2.05676300  | -2.22818400 | -1.56779300 |
| C | 2.33017200  | -3.57465300 | -1.84571500 |
| C | 3.27386500  | -4.24886600 | -1.12125500 |
| C | 3.96300300  | -3.60848800 | -0.06871100 |
| C | 3.67984000  | -2.24469200 | 0.23249300  |
| C | -3.67999000 | -2.24448300 | 0.23240000  |
| C | -3.96324300 | -3.60824400 | -0.06888100 |
| C | -3.27413500 | -4.24861400 | -1.12144900 |
| C | -2.33038500 | -3.57442800 | -1.84585900 |
| C | -2.05688600 | -2.22799300 | -1.56786300 |
| C | -4.33324000 | -1.65928300 | 1.34110100  |
| C | -5.24808000 | -2.36347100 | 2.07761400  |
| C | -5.55792000 | -3.69581500 | 1.74995200  |
| C | -4.92057300 | -4.30358400 | 0.70407900  |
| C | 4.92027400  | -4.30385400 | 0.70429800  |
| C | 5.55764800  | -3.69607400 | 1.75014800  |
| C | 5.24789600  | -2.36369200 | 2.07773700  |
| C | 4.33311500  | -1.65947900 | 1.34117400  |
| C | 3.19388200  | 3.47420000  | 0.16601300  |
| C | 4.71563500  | 3.37435100  | 0.02324900  |
| C | 2.70158100  | 4.53104600  | -0.82815700 |
| C | 2.88313800  | 3.90732500  | 1.60771400  |
| C | -3.19364500 | 3.47436800  | 0.16627100  |
| C | -2.70065900 | 4.53138200  | -0.82738100 |
| C | -4.71534000 | 3.37478300  | 0.02271000  |
| C | -2.88360100 | 3.90707900  | 1.60825000  |

|   |             |             |             |
|---|-------------|-------------|-------------|
| F | 0.00003900  | 3.26503300  | -1.67632700 |
| F | 0.00018400  | 3.76545000  | 0.55917500  |
| H | 4.38690300  | 0.84603000  | -0.13170300 |
| H | -4.38683700 | 0.84630900  | -0.13166800 |
| H | 1.32861500  | -1.69617700 | -2.16563500 |
| H | 1.79816200  | -4.07138000 | -2.64909800 |
| H | 3.50281200  | -5.28678600 | -1.33936300 |
| H | -3.50314900 | -5.28650700 | -1.33961400 |
| H | -1.79839700 | -4.07115000 | -2.64926100 |
| H | -1.32869300 | -1.69600400 | -2.16566700 |
| H | -4.08618500 | -0.64370800 | 1.62092700  |
| H | -5.73067900 | -1.89361200 | 2.92732000  |
| H | -6.28799100 | -4.24106000 | 2.33723000  |
| H | -5.13259000 | -5.33844000 | 0.45577100  |
| H | 5.13222200  | -5.33873800 | 0.45604700  |
| H | 6.28767300  | -4.24133900 | 2.33746500  |
| H | 5.73051500  | -1.89382100 | 2.92742500  |
| H | 4.08612700  | -0.64387200 | 1.62094300  |
| H | 5.14978900  | 4.36198600  | 0.19111000  |
| H | 5.15266400  | 2.69505600  | 0.75853300  |
| H | 5.00801100  | 3.04418000  | -0.97639100 |
| H | 3.26597400  | 5.45301600  | -0.66542400 |
| H | 1.64594200  | 4.75601700  | -0.70852600 |
| H | 2.86752700  | 4.20681000  | -1.85774200 |
| H | 3.26994500  | 3.17555200  | 2.32176000  |
| H | 3.37165600  | 4.86549900  | 1.80576100  |
| H | 1.81349400  | 4.02316200  | 1.76727100  |
| H | -3.26493400 | 5.45342800  | -0.66466700 |
| H | -1.64502600 | 4.75609100  | -0.70718800 |
| H | -2.86618200 | 4.20745700  | -1.85713200 |
| H | -5.14943600 | 4.36242800  | 0.19066200  |
| H | -5.15283400 | 2.69531900  | 0.75756200  |
| H | -5.00726300 | 3.04496900  | -0.97718000 |
| H | -3.27087800 | 3.17516500  | 2.32189700  |
| H | -1.81403500 | 4.02275000  | 1.76841200  |
| H | -3.37211600 | 4.86525600  | 1.80629000  |

### **Nap-BDP**

|   |             |             |             |
|---|-------------|-------------|-------------|
| C | -1.14207000 | 1.73926100  | -0.33242300 |
| N | -1.23997200 | 0.36031900  | -0.49985400 |
| B | -0.00000500 | -0.53354400 | -0.82523500 |
| N | 1.23998600  | 0.36030100  | -0.49986700 |

|   |             |             |             |
|---|-------------|-------------|-------------|
| C | 1.14210400  | 1.73925100  | -0.33246200 |
| N | 0.00002300  | 2.38571800  | -0.26267700 |
| C | -2.45488300 | 2.27818500  | -0.14234200 |
| C | -3.30412200 | 1.19599900  | -0.17272100 |
| C | -2.53701800 | 0.02468100  | -0.39951800 |
| C | 2.53702800  | 0.02465200  | -0.39957100 |
| C | 3.30415700  | 1.19596500  | -0.17282000 |
| C | 2.45493300  | 2.27816100  | -0.14242700 |
| F | -0.00000500 | -0.81403500 | -2.19649300 |
| F | -0.00001000 | -1.67882400 | -0.07030200 |
| C | 4.28703600  | -3.80740600 | -1.03651100 |
| C | 4.63926900  | -3.08734500 | 0.12572200  |
| C | 4.02363000  | -1.82972600 | 0.38461000  |
| C | 3.07934900  | -1.32145300 | -0.56053300 |
| C | 2.74809200  | -2.07232600 | -1.66764500 |
| C | 3.35169000  | -3.31597400 | -1.90437100 |
| C | 5.58059000  | -3.59941100 | 1.04680400  |
| C | 5.88825700  | -2.91775100 | 2.19176700  |
| C | 5.24931800  | -1.69638100 | 2.47109600  |
| C | 4.33848800  | -1.16969300 | 1.59437100  |
| C | -4.28713500 | -3.80731100 | -1.03655400 |
| C | -3.35177800 | -3.31588200 | -1.90440400 |
| C | -2.74814100 | -2.07225900 | -1.66764500 |
| C | -3.07936700 | -1.32140800 | -0.56050800 |
| C | -4.02365600 | -1.82968300 | 0.38462700  |
| C | -4.63933800 | -3.08727400 | 0.12570400  |
| C | -4.33848300 | -1.16967900 | 1.59441200  |
| C | -5.24932600 | -1.69636500 | 2.47112600  |
| C | -5.88830900 | -2.91770300 | 2.19176000  |
| C | -5.58067200 | -3.59933700 | 1.04677400  |
| C | -2.80718600 | 3.72499300  | 0.07087000  |
| C | -2.26727500 | 4.56812900  | -1.09024300 |
| C | -4.32259300 | 3.89443000  | 0.14733900  |
| C | -2.18534100 | 4.20907800  | 1.38707600  |
| C | 2.80725600  | 3.72495500  | 0.07085600  |
| C | 4.32267800  | 3.89441900  | 0.14695000  |
| C | 2.26700600  | 4.56826100  | -1.08997000 |
| C | 2.18574600  | 4.20881100  | 1.38731000  |
| H | -4.37806900 | 1.20190400  | -0.08009100 |
| H | 4.37810800  | 1.20185400  | -0.08023300 |
| H | 4.76587800  | -4.76319100 | -1.22262300 |
| H | 2.02589500  | -1.68559300 | -2.37427000 |
| H | 3.07759000  | -3.87687500 | -2.79031500 |
| H | 6.04807700  | -4.55466900 | 0.83139800  |

|   |             |             |             |
|---|-------------|-------------|-------------|
| H | 6.60917500  | -3.32305600 | 2.89261600  |
| H | 5.47043800  | -1.17386300 | 3.39502600  |
| H | 3.83423600  | -0.24268200 | 1.83684700  |
| H | -4.76600900 | -4.76307500 | -1.22269300 |
| H | -3.07770100 | -3.87676300 | -2.79036800 |
| H | -2.02594100 | -1.68552600 | -2.37426700 |
| H | -3.83419700 | -0.24269400 | 1.83691500  |
| H | -5.47042200 | -1.17387000 | 3.39507400  |
| H | -6.60923800 | -3.32300600 | 2.89259900  |
| H | -6.04819300 | -4.55457200 | 0.83134100  |
| H | -2.53842100 | 5.61738600  | -0.94387600 |
| H | -1.18158000 | 4.49506400  | -1.15194300 |
| H | -2.68948000 | 4.23585000  | -2.04180700 |
| H | -4.56788100 | 4.94888900  | 0.29456600  |
| H | -4.74703100 | 3.33294700  | 0.98360200  |
| H | -4.80883400 | 3.56165800  | -0.77319200 |
| H | -2.55323500 | 3.62032500  | 2.23110200  |
| H | -1.09944800 | 4.12441900  | 1.35587400  |
| H | -2.44859000 | 5.25649100  | 1.55950000  |
| H | 4.56798100  | 4.94886900  | 0.29421200  |
| H | 4.74735000  | 3.33287100  | 0.98305000  |
| H | 4.80868800  | 3.56174000  | -0.77373700 |
| H | 2.53821900  | 5.61749100  | -0.94353400 |
| H | 1.18129200  | 4.49522200  | -1.15134200 |
| H | 2.68891100  | 4.23611300  | -2.04171300 |
| H | 1.09984800  | 4.12407900  | 1.35640000  |
| H | 2.55391900  | 3.61996300  | 2.23114700  |
| H | 2.44896400  | 5.25621900  | 1.55980900  |

## 8. Reference

- [1] M.J.T. Frisch, G. W.; Schlegel, H. B.; Scuseria, G. E.; Robb, M. A.; Cheeseman, J. R.; Scalmani, G.; Barone, V.; Mennucci, B.; Petersson, G. A.; Nakatsuji, H.; Caricato, M.; Li, X.; Hratchian, H. P.; Izmaylov, A. F.; Bloino, J.; Zheng, G.; Sonnenberg, J. L.; Hada, M.; Ehara, M.; Toyota, K.; Fukuda, R.; Hasegawa, J.; Ishida, M.; Nakajima, T.; Honda, Y.; Kitao, O.; Nakai, H.; Vreven, T.; Montgomery, J. A., Jr.; Peralta, J. E.; Ogliaro, F.; Bearpark, M.; Heyd, J. J.; Brothers, E.; Kudin, K. N.; Staroverov, V. N.; Keith, T.; Kobayashi, R.; Normand, J.; Raghavachari, K.; Rendell, A.; Burant, J. C.; Iyengar, S. S.; Tomasi, J.; Cossi, M.; Rega, N.; Millam, J. M.; Klene, M.; Knox, J. E.; Cross, J. B.; Bakken, V.; Adamo, C.; Jaramillo, J.; Gomperts, R.; Stratmann, R. E.; Yazyev, O.; Austin, A. J.; Cammi, R.; Pomelli, C.; Ochterski, J. W.; Martin, R. L.; Morokuma, K.; Zakrzewski, V. G.; Voth, G. A.; Salvador, P.; Dannenberg, J. J.; Dapprich, S.; Daniels, A. D.; Farkas, O.; Foresman, J. B.; Ortiz, J. V.; Cioslowski, J.; Fox, D. J., Gaussian 09, revision D01, (2013).
- [2] C. Adamo, V. Barone, Toward reliable density functional methods without adjustable parameters: The PBE0 model, *J Chem Phys*, 110(1999) 6158-70.
- [3] V. Barone, M. Cossi, J. Tomasi, A new definition of cavities for the computation of solvation free energies by the polarizable continuum model, *J Chem Phys*, 107(1997) 3210-21.
- [4] J. Tomasi, B. Mennucci, R. Cammi, Quantum mechanical continuum solvation models, *Chem Rev*, 105(2005) 2999-3093.
- [5] T. Lu, F. Chen, Multiwfn: a multifunctional wavefunction analyzer, *J Comput Chem*, 33(2012) 580-92.
- [6] E.R. Johnson, S. Keinan, P. Mori-Sánchez, J. Contreras-García, A.J. Cohen, W. Yang, Revealing Noncovalent Interactions, *J Am Chem Soc*, 132(2010) 6498-506.
- [7] W. Humphrey, A. Dalke, K. Schulten, VMD: Visual molecular dynamics, *J Mol Graph*, 14(1996) 33-8.
